# Supplementary material for: Immune Checkpoint LAG3 and Its Ligand FGL1 in Cancer
Source: Front Immunol. 2022 Jan 17;12:785091. doi: 10.3389/fimmu.2021.785091 (PMC8801495; doi:10.3389/fimmu.2021.785091)
Supplement: Supplementary file 1 [file DataSheet_1.xlsx]

## Sheet: Sheet1
Clinical Trials of Anti-LAG3 in Various Tumors
First Posted	Last Update Posted	Actual Study Start Date	Title	Status	Results First Posted	NCT Number	Treatment ways	Target	Conditions	Interventions	Phase	Population
2013-10-23	2020-10-08	2013-10-14	An Investigational Immuno-therapy Study to Assess the Safety, Tolerability and Effectiveness of Anti-LAG-3 With and Without Anti-PD-1 in the Treatment of Solid Tumors	Recruiting	No	NCT01968109	Combination therapy	Anti-LAG-3; Anti-PD1	Neoplasms by Site	Biological: Relatlimab Biological: Nivolumab Biological: BMS-986213	Phase 1Phase 2	1500
December 29, 2016	2021-07-26	2016-11-07	Study of REGN3767 (Anti-LAG-3) With or Without REGN2810 (Anti-PD1) in Advanced Cancers	Recruiting	No	NCT03005782	Combination therapy	Anti-LAG-3; Anti-PD1	Malignancies	Drug: REGN3767 Drug: cemiplimab	Phase 1	669
2019-09-06	2021-04-05	2019-10-22	Study of Safety and Tolerability of Nivolumab Treatment Alone or in Combination With Relatlimab or Ipilimumab in Head and Neck Cancer	Recruiting	No	NCT04080804	Combination therapy	Anti-LAG-3; Anti-PD1; Anti-CTLA4	Head and Neck Squamous Cell Carcinoma (HNSCC)	Drug: Nivolumab Drug: Relatlimab Drug: Ipilimumab	Phase 2	60
2018-08-01	2021-06-11	2019-03-06	REACTION (Radiation Enhanced Assessment of Combination Therapies in Immuno-ONcology) - Nivolumab or Nivolumab in Combination With Other Immuno-oncology (IO) Agents After Targeted Systemic Radiation in Patients With Advanced Esophagogastric Cancer (REACTION)	Recruiting	No	NCT03610711	Combination therapy	Anti-LAG-3; Anti-PD1	Gastroesophageal Cancer Immune Checkpoint Inhibition	Drug: Nivolumab Drug: Relatlimab	Phase 1 Phase 2	21
2019-10-28	2021-08-20	2019-11-11	Dose Escalation Study of a PD1-LAG3 Bispecific Antibody in Patients With Advanced and/or Metastatic Solid Tumors	Recruiting	No	NCT04140500	Combination therapy	Anti-LAG-3; Anti-PD1	Solid Tumors Metastatic Melanoma Non-small Cell Lung Cancer Esophageal Squamous Cell Carcinoma	Drug: RO7247669	Phase 1	320
2019-11-05	2021-07-23	2020-06-30	Immuno-Oncology Drugs Elotuzumab, Anti-LAG-3 and Anti-TIGIT	Recruiting	No	NCT04150965	Combination therapy	Anti-LAG-3; Anti-TIGIT	Multiple Myeloma Relapsed Refractory Multiple Myeloma	Drug: Elotuzumab, pomalidomide, dexamethasone Drug: Anti-LAG-3 Drug: Anti-LAG-3 + Pomalidimide + Dexamethasone Drug: Anti-TIGIT Drug: Anti-TIGIT + Pomalidimide + Dexamethasone	Phase 1 Phase 2	104
2020-05-01	2021-08-11	2020-07-28	Study of Combination Therapy With INCMGA00012 (Anti-PD-1), INCAGN02385 (Anti-LAG-3), and INCAGN02390 (Anti-TIM-3) in Participants With Select Advanced Malignancies	Recruiting	No	NCT04370704	Combination therapy	Anti-LAG-3; Anti-PD-1; Anti-TIM-3	Melanoma	Drug: INCAGN02385 Drug: INCAGN02390 Drug: INCMGA00012.	Phase 1 Phase 2	52
2018-02-22	2021-08-24	2018-04-16	FS118 First in Human Study in Patients With Advanced Malignancies	Recruiting	No	NCT03440437	Combination therapy	Anti-LAG-3; Anti-PD-L1	Advanced Cancer Metastatic Cancer Squamous Cell Carcinoma of Head and Neck	Drug: FS118	Phase 1 Phase 2	80
2018-03-08	2020-10-22	2018-05-25	An Investigational Study of Immunotherapy Combinations in Participants With Solid Cancers That Are Advanced or Have Spread	Recruiting	No	NCT03459222	Combination therapy	Anti-LAG-3; Anti-PD1; Anti-CTLA4; IDO1 inhibitor	Advanced Cancer	Biological: Relatlimab Biological: Nivolumab Drug: BMS-986205 Biological: Ipilimumab	Phase 1 Phase 2	230
2020-11-18	2021-07-26	2021-03-17	Enoblituzumab Plus Retifanlimab or Tebotelimab in Head and Neck Cancer	Recruiting	No	NCT04634825	Combination therapy	Anti-LAG-3; Anti-PD-1; Anti-B7-H3	Head and Neck Cancer Head and Neck Neoplasms Head and Neck Squamous Cell Carcinoma	Biological: Enoblituzumab Biological: Retifanlimab Biological: Tebotelimab	Phase 2	80
2020-11-02	2021-05-10	2021-04-22	T-cell Therapy in Combination With Nivolumab, Relatlimab and Ipilimumab for Patients With Metastatic Ovarian Cancer	Recruiting	No	NCT04611126	Combination therapy	Anti-LAG-3; Anti-PD1; Anti-CTLA4	Metastatic Ovarian Cancer Metastatic Fallopian Tube Cancer Peritoneal Cancer	Drug: Ipilimumab Drug: Cyclophosphamid Drug: Fludarabine Phosphate Biological: Tumor Infiltrating Lymphocytes infusion Drug: Nivolumab Drug: Relatlimab	Phase 1 Phase 2	18
2021-03-08	2021-08-13	2021-06-25	A Study of RO7121661 and RO7247669 Compared With Nivolumab in Participants With Advanced or Metastatic Squamous Cell Carcinoma of the Esophagus	Recruiting	No	NCT04785820	Combination therapy	Anti-LAG-3; Anti-PD-1; Anti-TIM-3	Advanced or Metastatic Esophageal Squamous Cell Carcinoma	Drug: RO7121661 Drug: RO7247669 Drug: Nivolumab	Phase 2	255
2018-08-09	2021-08-19	2019-04-03	Nivolumab and Relatlimab in Treating Participants With Advanced Chordoma	Recruiting	No	NCT03623854	Combination therapy	Anti-LAG-3; Anti-PD-1	Chordoma Locally Advanced Chordoma Metastatic Chordoma Unresectable Chordoma	Biological: Nivolumab Biological: Relatlimab	Phase 2	20
2018-11-16	2021-04-23	2019-03-29	Nivolumab, BMS-936558 in Combination With Relatlimab, BMS-986016 in Patients With Metastatic Melanoma Naïve to Prior Immunotherapy in the Metastatic Setting	Recruiting	No	NCT03743766	Combination therapy	Anti-LAG-3; Anti-PD-1	Melanoma	Drug: Relatlimab Drug: Nivolumab Drug: Relatlimab + Nivolumab	Phase 2	42
2020-09-28	2021-07-26	2021-02-04	A Study of Relatlimab in Combination With Nivolumab in Participants With Advanced Liver Cancer Who Have Never Been Treated With Immuno-oncology Therapy After Prior Treatment With Tyrosine Kinase Inhibitors	Recruiting	No	NCT04567615	Combination therapy	Anti-LAG-3; Anti-PD-1	Hepatocellular Carcinoma Hepatoma Liver Cancer, Adult Liver Cell Carcinoma Liver Cell Carcinoma, Adult	Biological: Nivolumab Biological: Relatlimab	Phase 2	250
2020-12-08	2021-08-20	2021-05-28	Feasibility and Efficacy of Perioperative Nivolumab With or Without Relatlimab for Patients With Potentially Resectable Hepatocellular Carcinoma (HCC)	Recruiting	No	NCT04658147	Combination therapy	Anti-LAG-3; Anti-PD-1	Hepatocellular Carcinoma	Drug: Nivolumab Drug: Relatlimab	Phase 1	20
2020-11-23	2021-06-01	2021-01-12	A Study to Assess LBL-007 in Combination With Toripalimab in Subjects With Advanced Melanoma	Recruiting	No	NCT04640545	Combination therapy	Anti-LAG-3; Anti-PD-1	Advanced Melanoma	Drug: LBL-007 Drug: Toripalimab	Phase 1	68
2015-06-08	2021-08-27	2015-08-12	Targeted Therapy Directed by Genetic Testing in Treating Patients With Advanced Refractory Solid Tumors, Lymphomas, or Multiple Myeloma (The MATCH Screening Trial)	Recruiting	No	NCT02465060	Combination therapy	Anti-LAG-3; Anti-PD-1; Anti-HER2	Advanced Malignant Solid Neoplasm Bladder Carcinoma Breast Carcinoma Cervical Carcinoma Colon Carcinoma Colorectal Carcinoma Endometrial Carcinoma Esophageal Carcinoma Gastric Carcinoma Glioma Head and Neck Carcinoma Kidney Carcinoma Liver and Intrahepatic Bile Duct Carcinoma Lung Carcinoma Lymphoma Malignant Uterine Neoplasm Melanoma Ovarian Carcinoma Pancreatic Carcinoma Plasma Cell Myeloma Pro…	Drug: Adavosertib Drug: Afatinib Drug: Afatinib Dimaleate Drug: Binimetinib Drug: Capivasertib Drug: Copanlisib Drug: Copanlisib Hydrochloride Drug: Crizotinib Other: Cytology Specimen Collection Procedure Drug: Dabrafenib Drug: Dabrafenib Mesylate Drug: Dasatinib Drug: Defactinib Drug: Defactinib Hydrochloride Drug: Erdafitinib Drug: FGFR Inhibitor AZD4547 Drug: Ipatasertib Other: Laboratory Bio…	Phase 2	6452
2020-09-28	2021-04-01	2020-09-11	89Zr-DFO-REGN3767 in PET Scans in People With Diffuse Large B Cell Lymphoma (DLBCL)	Recruiting	No	NCT04566978	Monotherapy	Anti-LAG-3	Large B-cell Lymphoma DLBCL	Drug: 89Zr-DFO-REGN3767	Early Phase 1	20
2021-06-07	2021-06-14	2021-09-09	Study of IBI323 in Patients With Advanced Malignancies	Recruiting	No	NCT04916119	Monotherapy	Anti-LAG-3; Anti-PD-L1	Advanced Malignancies	Drug: IBI323	Phase 1	322
2021-03-23	2021-04-12	2021-12-06	Combination Study With Eftilagimod Alpha (a Soluble LAG-3 Fusion Protein) and Pembrolizumab in Patients With Recurrent or Metastatic HNSCC (TACTI-003)	Recruiting	No	NCT04811027	Combination therapy	Anti-LAG-3; Anti-PD-1	HNSCC	Drug: Eftilagimod alpha Drug: Pembrolizumab	Phase 2	154
2020-02-05	2021-07-20	Estimated Study Start Date :2022/6/1	A Study in Hormone Receptor-positive Metastatic Breast Carcinoma Patients to Test a New Schedule of Efti (IMP321, Eftilagimod Alpha) as Adjunctive to a Weekly Treatment Regimen of Paclitaxel (AIPAC-002)	Not yet recruiting	No	NCT04252768	Combination therapy	Anti-LAG-3	Metastatic Breast Cancer	Drug: Eftilagimod Alpha Drug: Paclitaxel	Phase 1	24
2018-04-05	2021-02-18	2018-05-08	Sym022 (Anti-LAG-3) in Patients With Advanced Solid Tumor Malignancies or Lymphomas	Completed	2021-02-18	NCT03489369	Monotherapy	Anti-LAG-3	Metastatic Cancer, Solid Tumor, Lymphoma	Drug: Sym022	Phase 1	15
2006-07-10	2010-01-07	2006-07-01	IMP321 Plus First-line Paclitaxel in Metastatic Breast Carcinoma	Completed	No	NCT00349934	Monotherapy	Anti-LAG-3	Metastatic Breast Cancer	Biological: IMP321	Phase 1	33
2006-07-13	2010-01-07	2005-09-01	IMP321 Phase 1 Trial in Metastatic Renal Cell Carcinoma (MRCC)	Completed	2008-10-01	NCT00351949	Monotherapy	Anti-LAG-3	Stage IV Renal Cell Carcinoma	Biological: IMP321	Phase 1	24
2016-02-08	2019-12-18	2016-04-01	Phase 1 Study of IMP321 (Eftilagimod Alpha) Adjuvant to Anti-PD-1 Therapy in Unresectable or Metastatic Melanoma (TACTI-mel)	Completed	2019-12-01	NCT02676869	Combination therapy	Anti-LAG-3; Anti-PD-1	Stage IV Melanoma Stage III Melanoma	Drug: IMP321 (eftilagimod alpha) Drug: Pembrolizumab	Phase 1	24
2016-11-17	2020-08-05	2016-11-28	Safety Study of BMS-986016 With or Without Nivolumab in Patients With Advanced Solid Tumors	Active, not recruiting	No	NCT02966548	Combination therapy	Anti-LAG-3; Anti-PD-1	Cancer	Drug: Relatlimab Drug: Nivolumab	Phase 1	45
2016-01-20	2021-03-12	2016-08-24	Anti-LAG-3 Alone & in Combination w/ Nivolumab Treating Patients w/ Recurrent GBM (Anti-CD137 Arm Closed 10/16/18)	Active, not recruiting	No	NCT02658981	Combination therapy	Anti-LAG-3; Anti-PD-1; Anti-CD137	Glioblastoma Gliosarcoma Recurrent Brain Neoplasm	Biological: Anti-LAG-3 Monoclonal Antibody BMS 986016 Biological: Anti-PD-1 Other: Pharmacological Study Other: Laboratory Biomarker Analysis Biological: Anti-CD137	Phase 1	63
2015-08-10	2021-08-27	2016-02-02	Neoadjuvant and Adjuvant Checkpoint Blockade	Active, not recruiting	No	NCT02519322	Combination therapy	Anti-LAG-3; Anti-PD-1; Anti-CTLA-4	Cutaneous Melanoma Mucosal Melanoma Ocular Melanoma Stage III Acral Lentiginous Melanoma AJCC v7 Stage IIIB Cutaneous Melanoma AJCC v7 Stage IIIB Uveal Melanoma AJCC v7 Stage IIIC Cutaneous Melanoma AJCC v7 Stage IIIC Uveal Melanoma AJCC v7 Stage IV Acral Lentiginous Melanoma AJCC v6 and v7 Stage IV Cutaneous Melanoma AJCC v6 and v7 Stage IV Uveal Melanoma AJCC v7	Biological: Ipilimumab Other: Laboratory Biomarker Analysis Biological: Nivolumab Biological: Relatlimab Procedure: Therapeutic Conventional Surgery	Phase 2	53
2017-10-17	2020-11-17	2017-12-07	Sym021 Monotherapy, in Combination With Sym022 or Sym023, and in Combination With Both Sym022 and Sym023 in Patients With Advanced Solid Tumor Malignancies or Lymphomas	Active, not recruiting	No	NCT03311412	Combination therapy	Anti-LAG-3; Anti-PD1; Anti-TIM-3	Metastatic Cancer Solid Tumor Lymphoma	Drug: Sym021 Drug: Sym022 Drug: Sym023	Phase 1	108
February 13, 2014	August 11, 2020	2014-02-25	A Study to Evaluate the Safety, Tolerability, and Efficacy of Relatlimab in Relapsed or Refractory B-Cell Malignancies	Active, not recruiting	No	NCT02061761	Combination therapy	Anti-LAG-3; Anti-PD1	Hematologic Neoplasms	Biological: BMS-986016Biological: BMS-936558	Phase 1 Phase 2	109
2017-08-16	2021-05-18	2017-08-08	Study of TSR-033 With an Anti-programmed Cell Death-1 Receptor (PD-1) in Participants With Advanced Solid Tumors (CITRINO)	Active, not recruiting	No	NCT03250832	Combination therapy	Anti-LAG-3; Anti-PD1	Neoplasms	Drug: TSR-033 Drug: Dostarlimab Drug: mFOLFOX6 Drug: FOLFIRI Drug: Bevacizumab	Phase 1	111
2017-02-07	2021-04-09	2017-07-11	Nivolumab +/- Relatlimab Prior to Chemoradiation With II/III Gastro/Esophageal Cancer	Active, not recruiting	No	NCT03044613	Combination therapy	Anti-LAG-3; Anti-PD-1	Gastric Cancer Esophageal Cancer GastroEsophageal Cancer	Drug: Nivolumab Drug: Relatlimab Drug: Carboplatin Drug: Paclitaxel Radiation: Radiation	Phase 1	32
2020-11-24	2021-08-24	2020-10-12	Sym021 in Combination With Either Sym022 or Sym023 or Sym023 and Irinotecan in Patients With Recurrent Advanced Biliary Tract Carcinomas	Active, not recruiting	No	NCT04641871	Combination therapy	Anti-LAG-3; Anti-PD-1; Anti-TIM-3	Metastatic Cancer Solid Tumor	Drug: Sym021 Drug: Sym022 Drug: Sym023 Drug: Irinotecan Hydrochloride	Phase 1	100
2018-09-07	2021-08-16	2018-10-16	An Investigational Study of Immunotherapy Combinations With Chemotherapy in Patients With Gastric or Gastroesophageal Junction (GEJ) Cancers	Active, not recruiting	No	NCT03662659	Combination therapy	Anti-LAG-3	Gastric Cancer Cancer of the Stomach Esophagogastric Junction	Biological: BMS-986213 Biological: Nivolumab Drug: XELOX Drug: FOLFOX Drug: SOX	Phase 2	274
2017-07-17	2021-08-09	2017-08-18	A Study of MGD013 in Patients With Unresectable or Metastatic Neoplasms	Active, not recruiting	No	NCT03219268	Combination therapy	Anti-LAG-3; Anti-PD-1	Advanced Solid Tumors Hematologic Neoplasms Ovarian Cancer HER2-positive Breast Cancer Non Small Cell Lung Cancer Small-cell Lung Cancer Squamous Cell Carcinoma of Head and Neck Cholangiocarcinoma Cervical Cancer TNBC - Triple-Negative Breast Cancer	Biological: MGD013 Biological: MGD013 in combination with margetuximab	Phase 1	352
2015-07-02	2020-09-10	2015-10-08	An Investigational Immuno-therapy Study to Investigate the Safety and Effectiveness of Nivolumab, and Nivolumab Combination Therapy in Virus-associated Tumors (CheckMate358)	Active, not recruiting	No	NCT02488759	Combination therapy	Anti-LAG-3; Anti-PD1; Anti-CTLA4	Various Advanced Cancer	Drug: Nivolumab Drug: Ipilimumab Drug: Relatlimab Drug: Daratumumab	Phase 1 Phase 2	584
2015-11-25	2020-11-12	2015-12-01	IMP321 (Eftilagimod Alpha) as Adjunctive to a Standard Chemotherapy Paclitaxel Metastatic Breast Carcinoma	Active, not recruiting	No	NCT02614833	Combination therapy	Anti-LAG-3	Adenocarcinoma Breast Stage IV	Biological: IMP321 (eftilagimod alpha) Drug: Placebo Drug: Paclitaxel	Phase 2	241
2014-02-11	2019-11-06	2014-03-07	An Investigational Immuno-therapy Study of Nivolumab, and Nivolumab in Combination With Other Anti-cancer Drugs, in Colon Cancer That Has Come Back or Has Spread (CheckMate142)	Active, not recruiting	No	NCT02060188	Combination therapy	Anti-LAG-3; Anti-PD1; Anti-CTLA4	Microsatellite Unstable Colorectal Cancer Microsatellite Stable Colorectal Cancer Mismatch Repair Proficient Colorectal Cancer Mismatch Repair Deficient Colorectal Cancer	Drug: Ipilimumab Drug: Nivolumab Drug: Cobimetinib Drug: Daratumumab Drug: anti-LAG-3 antibody	Phase 2	340
2018-04-11	2021-08-23	2018-09-24	Cytokine Microdialysis for Real-Time Immune Monitoring in Glioblastoma Patients Undergoing Checkpoint Blockade	Active, not recruiting	No	NCT03493932	Combination therapy	Anti-LAG-3; Anti-PD-1	Glioblastoma	Drug: Nivolumab Drug: BMS-986016	Phase 1	18
