# Supplementary material for: Immune Checkpoint LAG3 and Its Ligand FGL1 in Cancer
Source: Front Immunol. 2022 Jan 17;12:785091. doi: 10.3389/fimmu.2021.785091 (PMC8801495; doi:10.3389/fimmu.2021.785091)
Supplement: Supplementary file 2 [file DataSheet_2.xlsx]

## Sheet: Sheet1
Viewpoints and Reasons for the Discrepancy
Title			Viewpoints								Source(PMID)			Possible Reasons for This Discrepancy
FGL1 Expression site			①FGL1 is mainly expressed in the cytoplasm of NSCLC tumor cells								30580966			In addition to acting as an immune checkpoint gene, FGL1 may also serve as an oncogene in NSCLC
			②FGL1 is mainly expressed on the surface of breast cancer cells								31841754
Immune Cell Function			①LAG3 is positively associated with immune cells, including T cells, B cells, cytotoxic lymphocytes, NK cells, and dendritic cells								34267742			The discrepancy of LAG3 exerts positively or negatively in immune functions can be attributed to the complexity of tumor immune microenvironment and tumor heterogeneity, besides, LAG3 may not create immunosuppression when acting alone, but only when acting in combination with other immune checkpoints such as PD1.
			②In breast cancer, lung adenocarcinoma, and lung squamous carcinoma, LAG3 is associated with the increased infiltration of NK cells and DC cells								31721169
			③In breast cancer, the proliferative and secretory function of T cells can be significantly decreased by the double positive expression of LAG3 and PD1; the amount of LAG3+PD1+ T cells is highest in TNBC and lowest in ER+/PR+ breast cancer								30115704 31841754
Tumor Growth, Invasion, and Migration			①In LKB1 mutant lung carcinoma，the silence of FGL1 induces the increased cell growth rate and cell migration, promote tumor angiogenesis and epithelial- mesenchymal transition (EMT)								31322182			The role of FGL1 differs in these tumors can be attributed to the tumor heterogeneity, the results of FGL1 in MC38 colon cancer cells are more complete and compelling, it is hard to explain the results of the downregulation of FGL1 regulates EMT in SGC-7901 gastric cancer cell and LKB1-overexpressing A549 lung carcinoma cell, which are totally reverse and incredible
			②The growth rate of HCC in FGL1-null mice is faster compared to that in wild type mice								26225745
			③For SGC-7901 gastric cancer cell, the silence of FGL1 can effectively inhibit SGC-7901 gastric cancer cell line invasion, proliferation and migration								29845203
Prognostic markers			①NSCLC		High expression of FGL1 is related to the poor 5-year OS						30580966			LAG3 is considered a favorable prognostic marker, which may be attributed to the fact that a temporary high LAG3 expression after immunotherapy is associated with T cell activation and infiltration, leading to a better response to immune checkpoint inhibitors. The results that the co-expression predict diverse prognosis can be attributed to the interactions between LAG3 and other molecules are di…
			②CRC		High expression of LAG3 is related to the tumor stage and poor OS						34217699
			③HNSCC		LAG3(>377pg/ml) predicts unfavorable PFS and OS						34357118
			④EBV-positive and MLH1-defective gastric cancer		High infiltration of LAG3+ cells may induce immune escape in tumors with fewer IFN-γ+ cells and perforin-1+ cells and more Treg cells and M2 macrophages in this subtype of gastric cancer						33105024
			⑤MIBC		The enrichment of LAG3+ T cells predicts poorer OS and DFS (44.6% and 39.2%, respectively), compared to those associated with low LAG3 expression (5-year OS and DFS were 77.1% and 60.2%, respectively)						32540859
			⑥Pancreatic ductal adenocarcinoma		High proportion of LAG3+ T cell infiltration may be associated with reduced DFS						33803936
			⑦HCC		Higher expression of FGL1and higher number of LAG3+ cells with reduced levels of CD8+ T cells indicated poor survival						32762721
			⑧PCNSL		The co-expression of LAG3 and TIM3 may serve as a T cell exhaustion marker						31292525 32632935
			⑨Gastric cancer		Higher ratio of LAG3+CD4+/CD4+ T cells and LAG3+CD8+/CD8+ T cells is associated with better prognosis						33611641
					Higher expression of FGL1 is positively associated with gastric cancer stage and lymph node metastasis, as well as the poor OS
					MHC II and LSECtin indicate a favorable survival in gastric cancer
			⑩Breast cancer		Higher expression of LAG3 predict the favorable survival in patients with ER-, ER+ and triple-negative breast cancer						34081635 28994421 25534622 33413541
					Double positive expression of LAG3 and PD1 predicts negative prognosis in breast cancer
